# Supplementary material
Source: Springer Nature journal article supplement (https://www.springermedizin.de/resource/supplementary/12936_2004_117_MOESM2_ESM.pdf/9546924)
Supplement: MOESM2 [file 9546924]

| <b>Variables</b>                       | <b>Severe malaria (n=583)</b> | <b>Survived (n=524)</b> | <b>Died (n=52)</b>     |
|----------------------------------------|-------------------------------|-------------------------|------------------------|
| <i><b>Demographic</b></i>              |                               |                         |                        |
| <b>Age (months)</b>                    | 25.5 ± 19.2                   | 25.0 ± 18.2             | 31.0 ± 26.9            |
| <b>Male : Female</b>                   | 299/284                       | 274/250                 | 20/31                  |
| <b>Height (cm)</b>                     | 87.9 ± 63.9                   | 88.1 ± 66.2             | 86.3 ± 21.9            |
| <b>Weight (kg)</b>                     | 10.8 ± 3.6                    | 10.7 ± 3.3              | 11.9 ± 5.5             |
| <i><b>Clinical</b></i>                 |                               |                         |                        |
| <b>Temperature (°C)</b>                | 38.5 ± 2.5                    | 38.6 ± 3.3              | 38.1 ± 1.4             |
| <b>Pulse (per min)</b>                 | 143.9 ± 28.3                  | 144.5 ± 27.5            | 137.0 ± 35.0           |
| <b>Respiratory rate (per min)</b>      | 49.7 ± 21.7                   | 49.2 ± 21.5             | 54.5 ± 23.2            |
| <b>Coma - BCS ≤ 2 (%)</b>              | 24.5                          | 21.0                    | 60.8                   |
| <b>Respiratory distress (%)</b>        | 31.0                          | 28.2                    | 62.7                   |
| <i><b>Laboratory</b></i>               |                               |                         |                        |
| <b>Lactate (mmol/L)</b>                | 6.2 ± 4.3                     | 5.8 ± 3.9               | 10.4 ± 6.0             |
| <b>Glucose (mmol/L)</b>                | 5.8 ± 2.7                     | 5.8 ± 2.6               | 5.2 ± 3.2              |
| <b>Hemoglobin (g/dL)</b>               | 5.0 ± 2.5                     | 4.9 ± 2.4               | 5.6 ± 2.9              |
| <b>Geo. mean parasitaemia/μL (IQR)</b> | 28,332 (8,800-113,597)        | 27,893 (8890-105943)    | 33,297 (7,160-214,525) |
| <b>Platelets (/uL)</b>                 | 125,859 ± 7,9434              | 124,052 ± 76,792        | 144,429 ± 101,815      |
| <b>White blood cells (/uL)</b>         | 13,949 ± 8,773                | 13,532 ± 8,443          | 18,229 ± 10,831        |
